# Supplementary material for: Population Analysis Identifies 15 Multi-Variant Dominant White Haplotypes in Horses
Source: MDPI journal article supplement (doi:10.3390/ani14030517), 2024-02-05
Supplement: s1 [file s1]

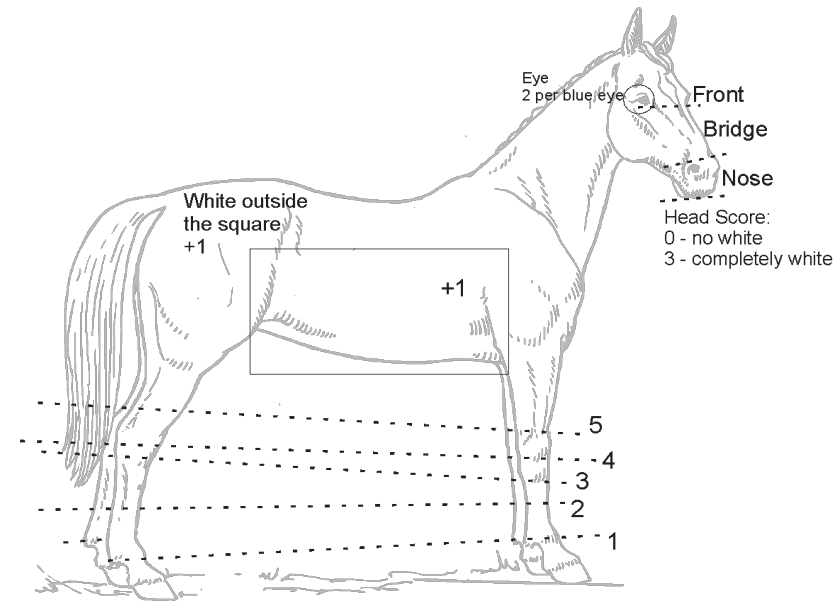

Supplementary Figure S1. Quantitative white spotting scoring diagram. We adapted the method as originally published to add two points for white on the body. Image adapted from Reider et al.
